# Supplementary figures and images for: Enhanced visible-light-driven photocatalysis of surface nitrided electrospun TiO2nanofibers
Source: Royal Society of Chemistry journal article supplement (doi:10.1039/c1nr11346a), 2011-12-13

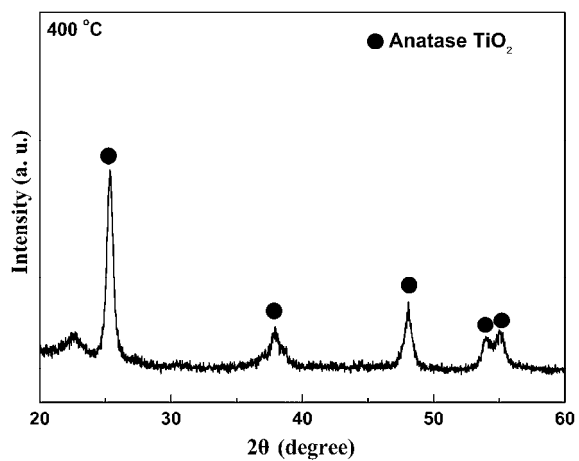

**Fig. S1.** XRD pattern of the TiO<sub>2</sub> nanofibers calcined at 400°C for 2 h in air atmosphere.

Supplement: c1nr11346a.pdf [file c1nr11346a.pdf]
